# Supplementary material
Source: publisher figshare collection journal article supplement (https://tandf.figshare.com/ndownloader/files/33158089)
Supplement: Supplementary file 1 [file 33158089]

Table S4. KEGG pathway enrichment analysis of the DE mRNAs in the network

| KEGG_A_class | KEGG_B_class | Pathway | P0-vs-P6 (52) | All (10505) | Pvalue |
| --- | --- | --- | --- | --- | --- |
| Human Diseases | Infectious diseases | Influenza A | 5 | 207 | 0.003469 |
| Metabolism | Lipid metabolism | Fatty acid biosynthesis | 2 | 29 | 0.008958 |
| Genetic Information Processing | Folding, sorting and degradation | Protein export | 2 | 33 | 0.011505 |
| Cellular Processes | Cell growth and death | Ferroptosis | 3 | 98 | 0.012505 |
| Metabolism | Metabolism of cofactors and vitamins | Pantothenate and CoA biosynthesis | 2 | 50 | 0.025305 |
| Metabolism | Xenobiotics biodegradation and metabolism | Drug metabolism - cytochrome P450 | 2 | 59 | 0.034365 |
| Cellular Processes | Cell growth and death | Necroptosis | 4 | 254 | 0.036547 |
| Cellular Processes | Cellular community - eukaryotes | Tight junction | 5 | 374 | 0.036857 |
| Metabolism | Xenobiotics biodegradation and metabolism | Metabolism of xenobiotics by cytochrome P450 | 2 | 64 | 0.039865 |
| Metabolism | Lipid metabolism | Steroid hormone biosynthesis | 2 | 65 | 0.041003 |
| Cellular Processes | Transport and catabolism | Phagosome | 4 | 264 | 0.041191 |
| Metabolism | Lipid metabolism | Fatty acid degradation | 2 | 70 | 0.046873 |
| Organismal Systems | Circulatory system | Vascular smooth muscle contraction | 4 | 278 | 0.048237 |
